# Supplementary material for: Long-Term Straw Incorporation under Controlled Irrigation Improves Soil Quality of Paddy Field and Rice Yield in Northeast China
Source: MDPI journal article supplement (doi:10.3390/plants13101357), 2024-05-14
Supplement: s1 [file s1]

## Supplementary Materials

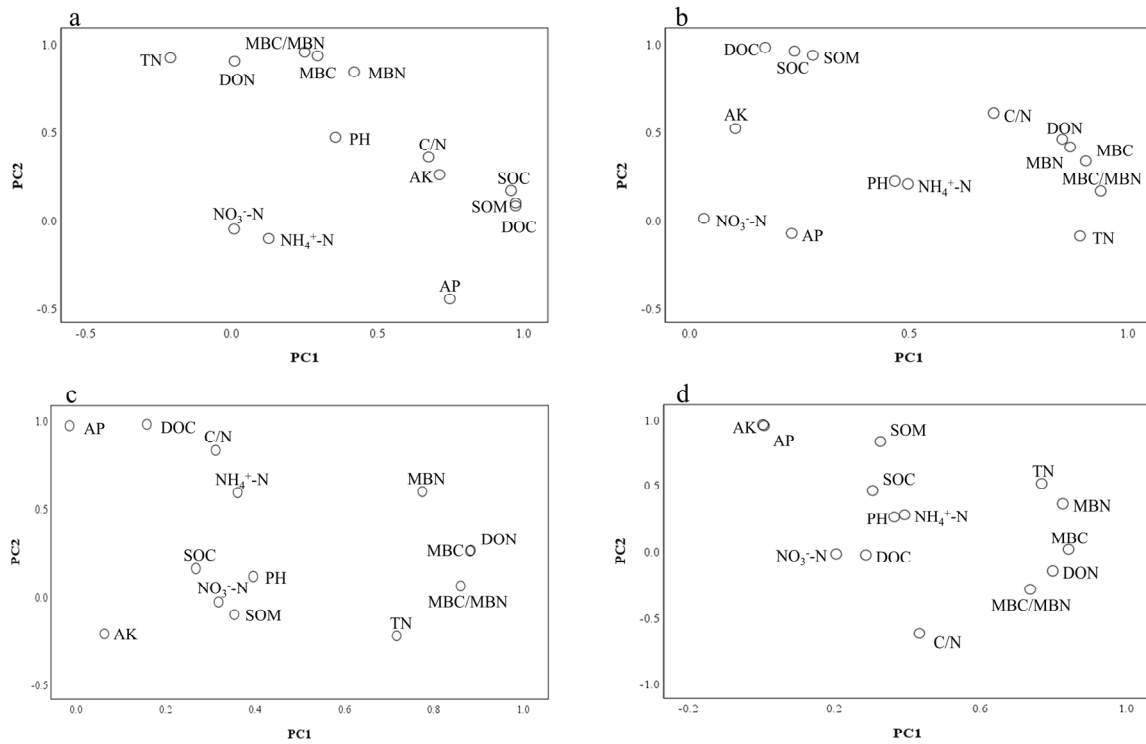

**Figure S1.** Principal component analysis for (a) F3, (b) C3, (c) C7 and (d) F7. Abbreviations refer to Figure 1. C/N: SOC/TN.

**Table S1.** Correlation coefficients and sum of correlation coefficients of high weight indicators under different treatments.

| F3                             |      |         |             | C3   |             |         |      | C7          |      |             |      | F7   |      |      |      |      |      |      |
|--------------------------------|------|---------|-------------|------|-------------|---------|------|-------------|------|-------------|------|------|------|------|------|------|------|------|
| PC1                            | MBC  | TN      | MBC/<br>MBN | DON  | MBC         | TN      | MBN  | MBC/<br>MBN | MBC  | MBC/<br>MBN | DON  | MBC  | TN   | MBN  | DON  |      |      |      |
| Correlation coefficient        |      |         |             |      |             |         |      |             |      |             |      |      |      |      |      |      |      |      |
| t                              |      |         |             |      |             |         |      |             |      |             |      |      |      |      |      |      |      |      |
| MBC                            | 1.00 | 0.74    | 1.00        | 0.80 | MBC         | 1.00    | 0.83 | 0.99        | 0.97 | MBC         | 1.00 | 0.97 | 1.00 | MBC  | 1.00 | 0.81 | 0.91 | 0.98 |
| TN                             | 0.74 | 1.00    | 0.79        | 0.82 | TN          | 0.83    | 1.00 | 0.76        | 0.93 | MBC/<br>MBN | 0.97 | 1.00 | 0.97 | TN   | 0.81 | 1.00 | 0.98 | 0.68 |
| MBC/MBN                        | 1.00 | 0.79    | 1.00        | 0.82 | MBN         | 0.99    | 0.76 | 1.00        | 0.94 | DON         | 1.00 | 0.97 | 1.00 | MBN  | 0.91 | 0.98 | 1.00 | 0.81 |
| DON                            | 0.80 | 0.82    | 0.82        | 1.00 | MBC/<br>MBN | 0.97    | 0.93 | 0.94        | 1.00 |             |      |      |      | DON  | 0.98 | 0.68 | 0.81 | 1.00 |
| Sum of correlation coefficient | 3.54 | 3.35    | 3.60        | 3.43 |             | 3.79    | 3.52 | 3.69        | 3.85 | 2.97        | 2.94 | 2.97 |      | 3.70 | 3.46 | 3.70 | 3.47 |      |
| ts                             |      |         |             |      |             |         |      |             |      |             |      |      |      |      |      |      |      |      |
| PC2                            | DOC  | SO<br>C | SOM         |      | DOC         | DO<br>M | SOC  | SOM         |      | SOC         | SOM  | AK   |      |      |      |      |      |      |

|             |      |      |      |     |      |      |      |      |     |      |      |      |
|-------------|------|------|------|-----|------|------|------|------|-----|------|------|------|
| Correlation |      |      |      |     |      |      |      |      |     |      |      |      |
| n           |      |      |      |     |      |      |      |      |     |      |      |      |
| coefficient |      |      |      |     |      |      |      |      |     |      |      |      |
| t           |      |      |      |     |      |      |      |      |     |      |      |      |
| DOC         | 1.00 | 0.99 | 1.00 | DOC | 1.00 | 0.98 | 0.99 | 1.00 | SOC | 1.00 | 0.95 | 0.80 |
| SOC         | 0.99 | 1.00 | 0.99 | DOM | 0.98 | 1.00 | 1.00 | 1.00 | SOM | 0.95 | 1.00 | 0.87 |
| SOM         | 1.00 | 0.99 | 1.00 | SOC | 0.99 | 1.00 | 1.00 | 1.00 | AK  | 0.80 | 0.87 | 1.00 |
|             |      |      |      | SOM | 0.97 | 1.00 | 1.00 | 1.00 |     |      |      |      |
| Sum of      |      |      |      |     |      |      |      |      |     |      |      |      |
| correlation |      |      |      |     |      |      |      |      |     |      |      |      |
| n           |      |      |      |     |      |      |      |      |     |      |      |      |
| coefficient | 2.99 | 2.98 | 2.99 |     | 3.94 | 3.98 | 3.98 | 3.96 |     | 2.74 | 2.82 | 2.66 |
| ts          |      |      |      |     |      |      |      |      |     |      |      |      |

Abbreviations refer to Figure 1.

**Table S2.** Correlation of high factor load indicators under different treatments.

| Treatments | F3                              |                                 | C7  |        |                                 |        | F7  |        |                                 |        |
|------------|---------------------------------|---------------------------------|-----|--------|---------------------------------|--------|-----|--------|---------------------------------|--------|
|            | PC3                             |                                 | PC3 |        | PC4                             |        | PC2 |        | PC4                             |        |
|            |                                 | NO <sub>3</sub> <sup>-</sup> -N |     | AP     |                                 | pH     |     | AK     |                                 | pH     |
|            | NH <sub>4</sub> <sup>+</sup> -N | 0.93**                          | DOC | 0.94** | NO <sub>3</sub> <sup>-</sup> -N | 0.80** | AP  | 0.99** | NH <sub>4</sub> <sup>+</sup> -N | 0.71** |

Note: C3 treatments PC3 and PC4 both have only one high factor loading indicator and therefore were placed directly into the MDS. Abbreviations refer to Figure 1.

The PC1 high-weight metric correlations (Table S1) showed that SOM under the F3 treatment had the largest sum of correlation coefficients and was therefore selected into MDS. The high weight indicator MBC/MBN in PC2 had the largest correlation coefficient sum and was therefore selected into the MDS. In PC3, the correlation coefficients of NH<sub>4</sub><sup>+</sup>-N and NO<sub>3</sub><sup>-</sup>-N were  $r > 0.60$  (Table S2), and NO<sub>3</sub><sup>-</sup>-N was selected into the MDS because it had a high factor loading. PC4 had only one high weight indicator C/N, so C/N was selected into the MDS. As a result, the MDS indicators for soil quality evaluation under F3 treatment were SOM, MBC/MBN, NO<sub>3</sub><sup>-</sup>-N and C/N

**Table S3.** Weights of TDS evaluation indicators of paddy soil under different treatments.

| Soil indicators                 | F3                     |              | C3                     |              | C7                     |              | F7                     |              |
|---------------------------------|------------------------|--------------|------------------------|--------------|------------------------|--------------|------------------------|--------------|
|                                 | Common factor variance | Weight value |
| pH                              | 0.86                   | 0.07         | 0.94                   | 0.07         | 0.98                   | 0.07         | 0.98                   | 0.07         |
| NH <sub>4</sub> <sup>+</sup> -N | 0.96                   | 0.07         | 0.85                   | 0.06         | 0.90                   | 0.07         | 0.99                   | 0.07         |
| NO <sub>3</sub> <sup>-</sup> -N | 0.94                   | 0.07         | 0.98                   | 0.07         | 0.97                   | 0.07         | 0.96                   | 0.07         |
| AK                              | 0.81                   | 0.06         | 0.94                   | 0.07         | 0.92                   | 0.07         | 0.95                   | 0.07         |
| AP                              | 0.94                   | 0.07         | 0.96                   | 0.07         | 0.95                   | 0.07         | 0.97                   | 0.07         |
| DOC                             | 0.97                   | 0.07         | 1.00                   | 0.07         | 0.98                   | 0.07         | 0.98                   | 0.07         |
| SOC                             | 0.96                   | 0.07         | 1.00                   | 0.07         | 0.96                   | 0.07         | 0.98                   | 0.07         |
| SOM                             | 0.97                   | 0.07         | 0.99                   | 0.07         | 0.99                   | 0.07         | 0.98                   | 0.07         |
| MBC                             | 0.98                   | 0.07         | 1.00                   | 0.07         | 1.00                   | 0.07         | 1.00                   | 0.07         |
| TN                              | 0.96                   | 0.07         | 0.99                   | 0.07         | 0.99                   | 0.07         | 0.99                   | 0.07         |

|         |      |      |      |      |      |      |      |      |
|---------|------|------|------|------|------|------|------|------|
| C/N     | 0.95 | 0.07 | 0.99 | 0.07 | 0.96 | 0.07 | 0.97 | 0.07 |
| MBN     | 0.97 | 0.07 | 1.00 | 0.07 | 0.99 | 0.07 | 1.00 | 0.07 |
| MBC/MBN | 0.98 | 0.08 | 1.00 | 0.07 | 1.00 | 0.07 | 0.99 | 0.07 |
| DON     | 0.84 | 0.06 | 1.00 | 0.07 | 1.00 | 0.07 | 1.00 | 0.07 |

Abbreviations refer to Figure 1.

**Table S4.** Weights of MDS evaluation indicators of paddy soil under different treatments.

| Treatments | Index                           | MDS                    |              |
|------------|---------------------------------|------------------------|--------------|
|            |                                 | Common factor variance | Weight value |
| F3         | MBC/MBN                         | 0.98                   | 0.26         |
|            | DOC                             | 0.97                   | 0.25         |
|            | NO <sub>3</sub> <sup>-</sup> -N | 0.94                   | 0.24         |
|            | C/N                             | 0.95                   | 0.25         |
| C3         | MBC/MBN                         | 1.00                   | 0.25         |
|            | SOC                             | 1.00                   | 0.25         |
|            | AP                              | 0.96                   | 0.24         |
|            | NO <sub>3</sub> <sup>-</sup> -N | 0.98                   | 0.25         |
| C7         | DON                             | 1.00                   | 0.25         |
|            | SOM                             | 0.99                   | 0.25         |
|            | DOC                             | 0.98                   | 0.25         |
|            | NO <sub>3</sub> <sup>-</sup> -N | 0.97                   | 0.25         |
| F7         | MBN                             | 1.00                   | 0.25         |
|            | AP                              | 0.97                   | 0.25         |
|            | DOC                             | 0.98                   | 0.25         |
|            | pH                              | 0.98                   | 0.25         |

Abbreviations refer to Figure 1.
